# Supplementary material for: The Landscape of Mutations in Human Fumarate Hydratase
Source: bioRxiv or medRxiv preprint supplement (doi:10.1101/852392), 2020-01-31
Supplement: Supplementary file [file media-1.pdf]

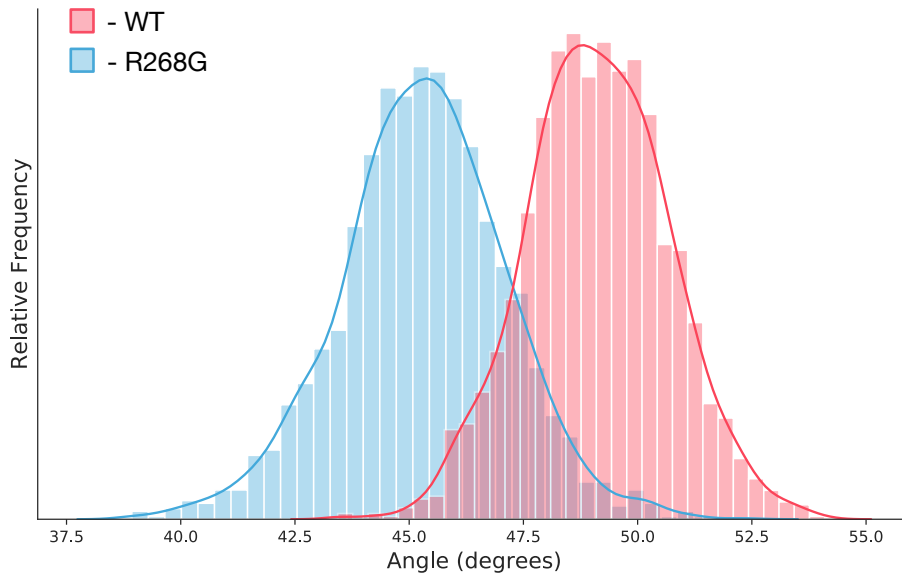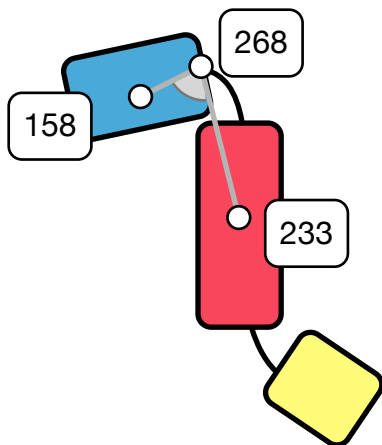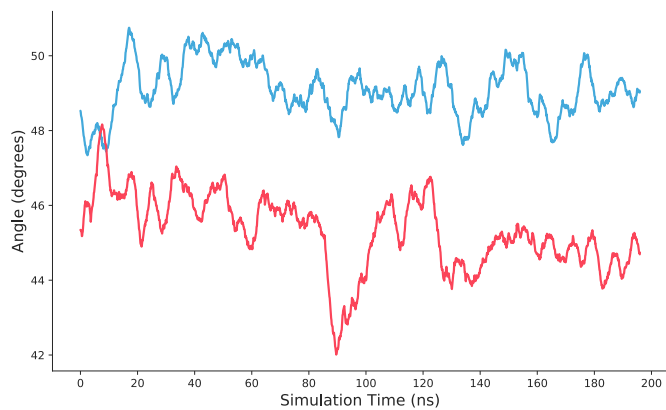

Figure S1: Molecular Dynamics of WT (red) vs R268G Mutant forms of FH (blue). Shown is the angle between residues 158, 268, 331.

Table S1: Classification for all potential mutations in FH  
 Table S2: Prediction for all mutations in the FH database  
 Table S3: Prediction for all mutations in FH in the Cancer Cell Line Encyclopedia
